# Supplementary material for: Development of a Novel Anti-CD44 Variant 5 Monoclonal Antibody C<sub>44</sub>Mab-3 for Multiple Applications against Pancreatic Carcinomas
Source: Preprints.org preprint supplement (doi:10.20944/preprints202301.0581.v1), 2023-01-31
Supplement: Supplementary file 1 [file supplementary]

**Supplementary Table S1.** The determination of the binding epitope of C44Mab-3 by ELISA.

| **Peptide** | **Coding exon*** | **Sequence** | **C44Mab-3** |
| --- | --- | --- | --- |
| CD44p21–40 | 2 | QIDLNITCRFAGVFHVEKNG | **–** |
| CD44p31–50 | 2 | AGVFHVEKNGRYSISRTEAA | **–** |
| CD44p41–60 | 2 | RYSISRTEAADLCKAFNSTL | **–** |
| CD44p51–70 | 2 | DLCKAFNSTLPTMAQMEKAL | **–** |
| CD44p61–80 | 2/3 | PTMAQMEKALSIGFETCRYG | **–** |
| CD44p71–90 | 2/3 | SIGFETCRYGFIEGHVVIPR | **–** |
| CD44p81–100 | 3 | FIEGHVVIPRIHPNSICAAN | **–** |
| CD44p91–110 | 3 | IHPNSICAANNTGVYILTSN | **–** |
| CD44p101–120 | 3 | NTGVYILTSNTSQYDTYCFN | **–** |
| CD44p111–130 | 3/4 | TSQYDTYCFNASAPPEEDCT | **–** |
| CD44p121–140 | 3/4 | ASAPPEEDCTSVTDLPNAFD | **–** |
| CD44p131–150 | 4 | SVTDLPNAFDGPITITIVNR | **–** |
| CD44p141–160 | 4 | GPITITIVNRDGTRYVQKGE | **–** |
| CD44p151–170 | 4/5 | DGTRYVQKGEYRTNPEDIYP | **–** |
| CD44p161–180 | 5 | YRTNPEDIYPSNPTDDDVSS | **–** |
| CD44p171–190 | 5 | SNPTDDDVSSGSSSERSSTS | **–** |
| CD44p181–200 | 5 | GSSSERSSTSGGYIFYTFST | **–** |
| CD44p191–210 | 5 | GGYIFYTFSTVHPIPDEDSP | **–** |
| CD44p201–220 | 5 | VHPIPDEDSPWITDSTDRIP | **–** |
| CD44p211–230 | 5/v3 | WITDSTDRIPATSTSSNTIS | **–** |
| CD44p221–240 | v3 | ATSTSSNTISAGWEPNEENE | **–** |
| CD44p231–250 | v3 | AGWEPNEENEDERDRHLSFS | **–** |
| CD44p241–260 | v3 | DERDRHLSFSGSGIDDDEDF | **–** |
| CD44p251–270 | v3/v4 | GSGIDDDEDFISSTISTTPR | **–** |
| CD44p261–280 | v4 | ISSTISTTPRAFDHTKQNQD | **–** |
| CD44p271–290 | v4 | AFDHTKQNQDWTQWNPSHSN | **–** |
| CD44p281–300 | v4 | WTQWNPSHSNPEVLLQTTTR | **–** |
| CD44p291–310 | v4 | PEVLLQTTTRMTDVDRNGTT | **–** |
| CD44p301–320 | v4/v5 | MTDVDRNGTTAYEGNWNPEA | **–** |
| CD44p311–330 | v5 | AYEGNWNPEAHPPLIHHEHH | **+** |
| CD44p321–340 | v5 | HPPLIHHEHHEEEETPHSTS | **+** |
| CD44p331–350 | v5/v6 | EEEETPHSTSTIQATPSSTT | **–** |
| CD44p341–360 | v5/v6 | TIQATPSSTTEETATQKEQW | **–** |
| CD44p351–370 | v6 | EETATQKEQWFGNRWHEGYR | **–** |
| CD44p361–380 | v6 | FGNRWHEGYRQTPREDSHST | **–** |
| CD44p371–390 | v6 | QTPREDSHSTTGTAAASAHT | **–** |
| CD44p381–400 | v6/v7 | TGTAAASAHTSHPMQGRTTP | **–** |
| CD44p391–410 | v6/v7 | SHPMQGRTTPSPEDSSWTDF | **–** |
| CD44p401–420 | v7 | SPEDSSWTDFFNPISHPMGR | **–** |
| CD44p411–430 | v7 | FNPISHPMGRGHQAGRRMDM | **–** |
| CD44p421–440 | v7/v8 | GHQAGRRMDMDSSHSTTLQP | **–** |
| CD44p431–450 | v8 | DSSHSTTLQPTANPNTGLVE | **–** |
| CD44p441–460 | v8 | TANPNTGLVEDLDRTGPLSM | **–** |
| CD44p451–470 | v8/v9 | DLDRTGPLSMTTQQSNSQSF | **–** |
| CD44p461–480 | v9 | TTQQSNSQSFSTSHEGLEED | **–** |
| CD44p471–490 | v9 | STSHEGLEEDKDHPTTSTLT | **–** |
| CD44p481–500 | v9/v10 | KDHPTTSTLTSSNRNDVTGG | **–** |
| CD44p491–510 | v10 | SSNRNDVTGGRRDPNHSEGS | **–** |
| CD44p501–520 | v10 | RRDPNHSEGSTTLLEGYTSH | **–** |
| CD44p511–530 | v10 | TTLLEGYTSHYPHTKESRTF | **–** |
| CD44p521–540 | v10 | YPHTKESRTFIPVTSAKTGS | **–** |
| CD44p531–550 | v10 | IPVTSAKTGSFGVTAVTVGD | **–** |
| CD44p541–560 | v10 | FGVTAVTVGDSNSNVNRSLS | **–** |
| CD44p551–570 | v10/16 | SNSNVNRSLSGDQDTFHPSG | **–** |
| CD44p561–580 | v10/16 | GDQDTFHPSGGSHTTHGSES | **–** |
| CD44p571–590 | 16 | GSHTTHGSESDGHSHGSQEG | **–** |
| CD44p581–600 | 16/17 | DGHSHGSQEGGANTTSGPIR | **–** |
| CD44p591–606 | 17 | GANTTSGPIRTPQIPEAAAA | **–** |

+, OD655≧0.3; －, OD655<0.1

*****The CD44 exon-cording regions are illustrated in Figure 1.
